# Kürschners Deutscher Literatur-Kalender

|                           |                                                                                                                                                                                                                                      |
|---------------------------|--------------------------------------------------------------------------------------------------------------------------------------------------------------------------------------------------------------------------------------|
| <b>Druckauflage:</b>      | 1.800 Exemplare                                                                                                                                                                                                                      |
| <b>Druck:</b>             | Offset                                                                                                                                                                                                                               |
| <b>Druckunterlagen:</b>   | Positivfilme oder druckfertige Highend-PDF-Dateien (mindestens 600 dpi auflösend, eingebundene Schriften – keine TrueType-Schriften, sondern ausschließlich PostScript-Schriften verwenden); grafische Gestaltung und Satz kostenlos |
| <b>Erscheinungsweise:</b> | zweijährlich im Oktober                                                                                                                                                                                                              |
| <b>Anzeigenschluss:</b>   | zweijährlich im August                                                                                                                                                                                                               |
| <b>Buchformat:</b>        | 118 mm b x 205 mm h, zzgl. jeweils 5 mm Beschnittzugabe ohne Aufschlag                                                                                                                                                               |

## Anzeigenpreise:

| <b>Format</b>        | <b>Satzspiegel<br/>Breite x Höhe</b> | <b>Preis in €<br/>s / w</b> | <b>Preis in €<br/>4 color</b> |
|----------------------|--------------------------------------|-----------------------------|-------------------------------|
| 1/1 Seite            | 104 mm x 175 mm                      | 1.650,-                     | 2.350,-                       |
| 2/3 Seite quer       | 104 mm x 112 mm                      | 1.190,-                     | 1.890,-                       |
| 2/3 Seite hoch       | 68 mm x 175 mm                       | 1.190,-                     | 1.890,-                       |
| 1/2 Seite quer       | 104 mm x 83 mm                       | 890,-                       | 1.010,-                       |
| 1/2 Seite hoch       | 50 mm x 175 mm                       | 890,-                       | 1.010,-                       |
| 1/4 Seite quer       | 104 mm x 40 mm                       | 470,-                       | 505,-                         |
| 2., 4. Umschlagseite | 104 mm x 175 mm                      | ----                        | 2.550,-                       |
| 3. Umschlagseite     | 104 mm x 175 mm                      | 1.716,-                     | 2.400,-                       |

Alle Preise verstehen sich netto zuzüglich der gesetzlichen Mehrwertsteuer. Ein Belegexemplar inklusive.

|                              |                                                                                                                                                                                                                                                                                                                          |
|------------------------------|--------------------------------------------------------------------------------------------------------------------------------------------------------------------------------------------------------------------------------------------------------------------------------------------------------------------------|
| <b>Beschnittene Formate:</b> | auf Anfrage                                                                                                                                                                                                                                                                                                              |
| <b>Nachlässe:</b>            | Rabatte für Mehrfachschaltungen und Nachlässe nach Absprache                                                                                                                                                                                                                                                             |
| <b>Lesezeichen:</b>          | auf Anfrage                                                                                                                                                                                                                                                                                                              |
| <b>Zahlungsweise:</b>        | Rechnungslegung                                                                                                                                                                                                                                                                                                          |
| <b>Zahlungsbedingungen:</b>  | nach Vereinbarung                                                                                                                                                                                                                                                                                                        |
| <b>Allgemeines:</b>          | Der Verlag behält sich vor, Anzeigen nicht anzunehmen, wenn er gegen ihre Veröffentlichung Bedenken hat. Es gelten die Allgemeinen Geschäftsbedingungen.                                                                                                                                                                 |
| <b>Anzeigenagentur:</b>      | DE GRUYTER<br>Frau Dietlind Makswitat<br>Postfach 30 34 21, 10278 Berlin<br>Tel.: +49 (030) 260 05-131<br>Fax: +49 (030) 260 05-322<br>anzeigen@deGruyter.com<br>www.degruyter.de<br><b>für den</b><br>K. G. Saur Verlag<br>Ein Imprint der WALTER DE GRUYTER GMBH & CO. KG<br>Mies-van-der-Rohe-Straße 1, 80807 München |
